# Supplementary material for: Real-time in situ monitoring using visible spectrophotometry as a tool for probing electrochemical advanced oxidation processes for dye decolorisation
Source: Royal Society of Chemistry journal article supplement (doi:10.1039/d3ra06634g), 2023-01-01
Supplement: d3ra06634g1.pdf [file d3ra06634g1.pdf]

# Real-time in-situ monitoring using visible spectrophotometry as a tool for probing electrochemical advanced oxidation processes for dye decolorisation

Chelsea M. Schroeder, Taylor M. Koehler, Kristiane K. Ohlhorst, and Nicholas E. Leadbeater\*

Department of Chemistry, University of Connecticut, 55 North Eagleville Road, Storrs, CT 06269-3060, USA.

\*E-mail: [nicholas.leadbeater@uconn.edu](mailto:nicholas.leadbeater@uconn.edu)

## SUPPORTING INFORMATION

### TABLE OF CONTENTS

|                                                        |          |
|--------------------------------------------------------|----------|
| <b><i>STL Files for 3D Printed Apparatus</i></b> ..... | <b>3</b> |
| <b><i>Acid Orange 7 (AO7)</i></b> .....                | <b>4</b> |
| Absorbance spectra .....                               | 4        |
| Plot of percent dye remaining vs time .....            | 4        |
| <b><i>Acid Orange 10 (AO10)</i></b> .....              | <b>5</b> |
| Absorbance spectra .....                               | 5        |
| Plot of percent dye remaining vs time .....            | 5        |
| <b><i>Acid Red 18 (AR18)</i></b> .....                 | <b>6</b> |
| Absorbance spectra .....                               | 6        |
| Plot of percent dye remaining vs time .....            | 6        |
| <b><i>Acid Blue 1 (AB1)</i></b> .....                  | <b>7</b> |
| Absorbance spectra .....                               | 7        |
| Plot of percent dye remaining vs time .....            | 7        |
| <b><i>Basic Violet 3 (BV3)</i></b> .....               | <b>8</b> |
| Absorbance spectra .....                               | 8        |
| Plot of percent dye remaining vs time .....            | 8        |
| <b><i>Acid Violet 19 (AV19)</i></b> .....              | <b>9</b> |
| Absorbance spectra .....                               | 9        |
| Plot of percent dye remaining vs time .....            | 9        |

|                                                |           |
|------------------------------------------------|-----------|
| <b><i>Acid Red 51 (AR51)</i></b> .....         | <b>10</b> |
| Absorbance spectra .....                       | 10        |
| Plot of percent dye remaining vs time .....    | 10        |
| <b><i>Acid Red 87 (AR87)</i></b> .....         | <b>11</b> |
| Absorbance spectra .....                       | 11        |
| Plot of percent dye remaining vs time .....    | 11        |
| <b><i>Acid Red 91 (AR91)</i></b> .....         | <b>12</b> |
| Absorbance spectra .....                       | 12        |
| Plot of percent dye remaining vs time .....    | 12        |
| <b><i>First order rate constants</i></b> ..... | <b>13</b> |

## **STL Files for 3D Printed Apparatus**

.stl Files for the 3D-Printed Continuous Monitoring System can be accessed at:

<https://drive.google.com/drive/folders/1mJG3-UcBzAMPNOvbM13GWpU37FFQ-Xp4?usp=sharing>

## Acid Orange 7 (AO7)

### Absorbance spectra

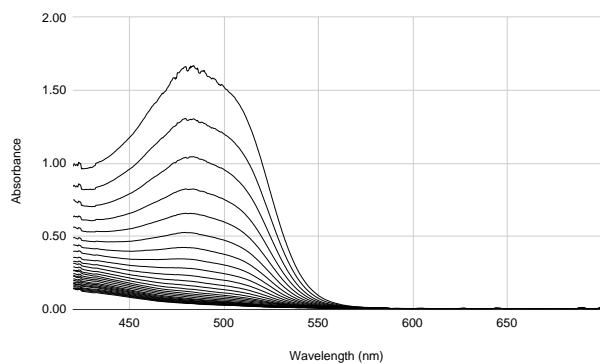

**Figure 1:** AO absorbance spectrum of AO7. Conditions: graphite anode, graphite cathode, [AO7] = 100  $\mu$ M, [Na<sub>2</sub>S<sub>2</sub>O<sub>8</sub>] = 14 mM, stirring = 1000 rpm, current = 5 mA, overlay spectrum recorded every minute from 4 - 30 min. Trial 1 of 3.

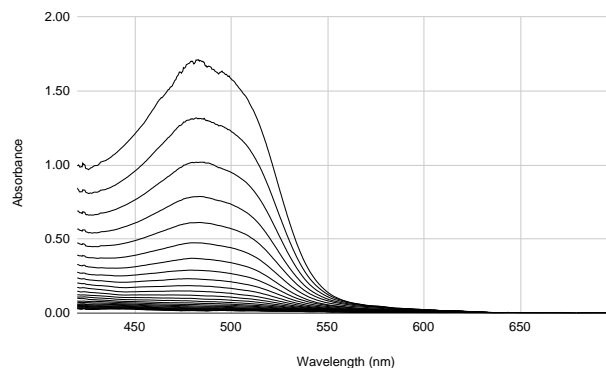

**Figure 2:** EAP absorbance spectrum of AO7. Conditions: BDD anode, graphite cathode, [AO7] = 100  $\mu$ M, [Na<sub>2</sub>S<sub>2</sub>O<sub>8</sub>] = 14 mM, stirring = 1000 rpm, current = 5 mA, overlay spectrum recorded every minute from 4 - 30 min. Trial 1 of 3.

### Plot of percent dye remaining vs time

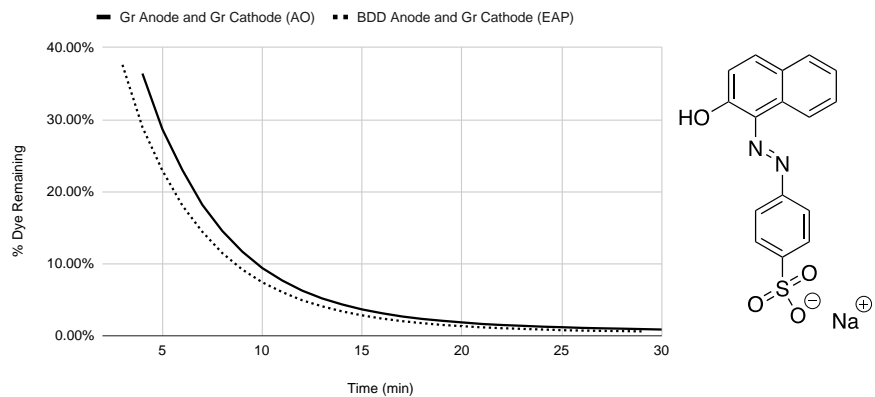

**Figure 3:** AO- and EAP-mediated decolorisation of Acid Orange 7 as a function of time at a  $\lambda_{max}$  = 484.16 nm.

## Acid Orange 10 (AO10)

### Absorbance spectra

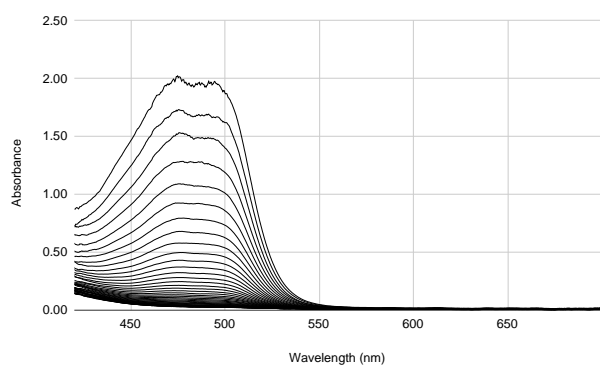

**Figure 4:** AO absorbance spectrum of AO10. Conditions: graphite anode, graphite cathode, [AO10] = 100  $\mu$ M, [Na<sub>2</sub>S<sub>2</sub>O<sub>8</sub>] = 14 mM, stirring = 1000 rpm, current = 5 mA, overlay spectrum recorded every minute from 4 - 30 min. Trial 1 of 3.

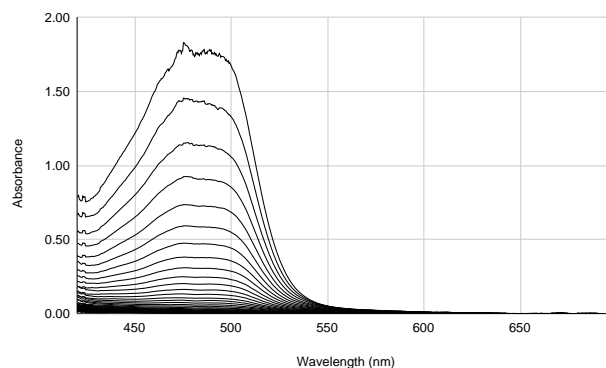

**Figure 5:** EAP absorbance spectrum of AO10. Conditions: BDD anode, graphite cathode, [AO10] = 100  $\mu$ M, [Na<sub>2</sub>S<sub>2</sub>O<sub>8</sub>] = 14 mM, stirring = 1000 rpm, current = 5 mA, overlay spectrum recorded every minute from 4 - 30 min. Trial 1 of 3.

### Plot of percent dye remaining vs time

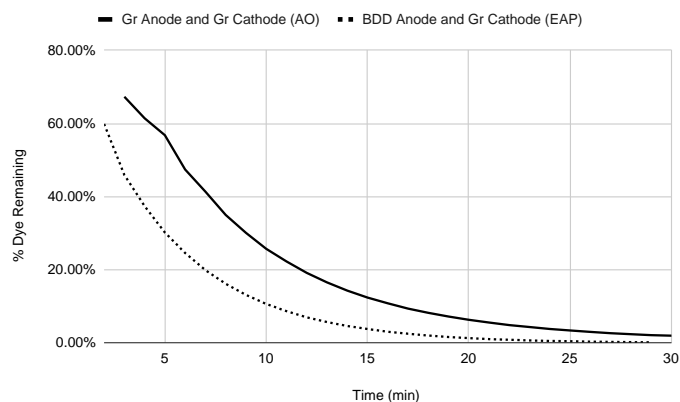

**Figure 6:** AO- and EAP-mediated decolorisation of AO10 as a function of time at a  $\lambda_{max}$  = 475.54 nm.

## Acid Red 18 (AR18)

Absorbance spectra

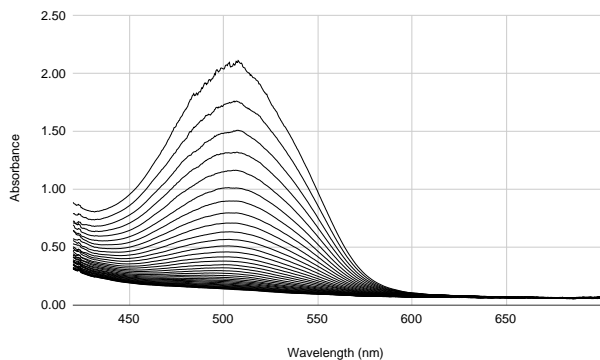

**Figure 7:** AO absorbance spectrum of AR18. Conditions: graphite anode, graphite cathode, [AR18] = 100  $\mu$ M, [Na<sub>2</sub>S<sub>2</sub>O<sub>8</sub>] = 14 mM, stirring = 1000 rpm, current = 5 mA, overlay spectrum recorded every minute from 6 - 40 min. Trial 1 of 3.

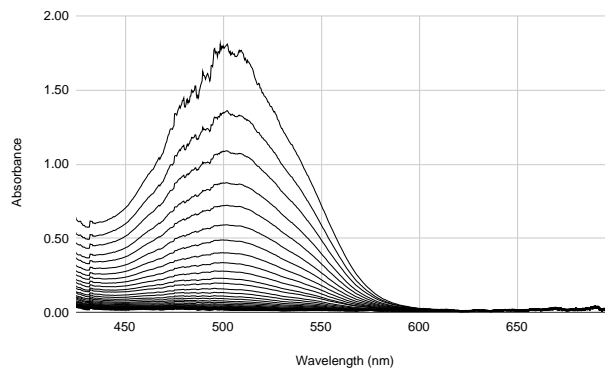

**Figure 8:** EAP absorbance spectrum of AR18. Conditions: BDD anode, graphite cathode, [AR18] = 100  $\mu$ M, [Na<sub>2</sub>S<sub>2</sub>O<sub>8</sub>] = 14 mM, stirring = 1000 rpm, current = 5 mA, overlay spectrum recorded every minute from 6 - 40 min. Trial 1 of 3.

Plot of percent dye remaining vs time

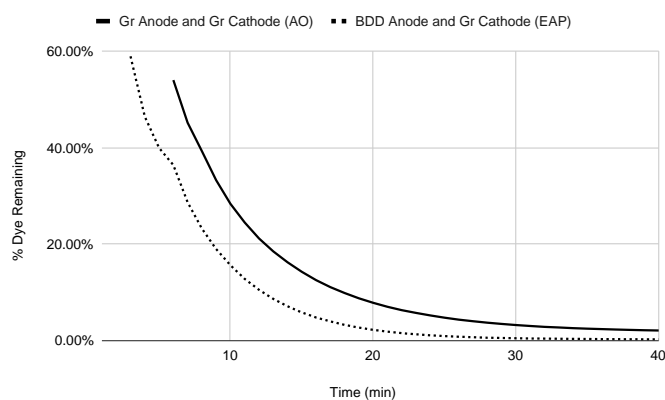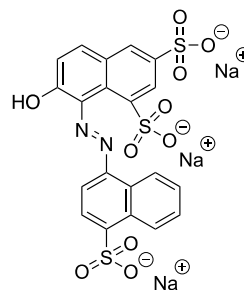

**Figure 9:** AO- and EAP-mediated decolorisation of AR18 as a function of time at a  $\lambda_{max}$  = 507.02 nm.

## Acid Blue 1 (AB1)

### Absorbance spectra

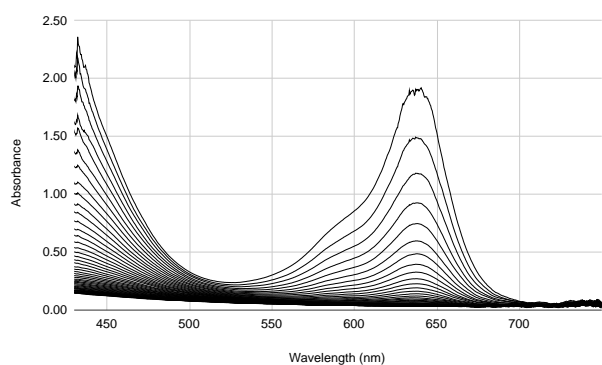

**Figure 10:** AO absorbance spectrum of AB1. Conditions: graphite anode, graphite cathode, [AB1] = 100  $\mu$ M, [Na<sub>2</sub>S<sub>2</sub>O<sub>8</sub>] = 14 mM, stirring = 1000 rpm, current = 5 mA, overlay spectrum recorded every minute from 10 - 60 min. Trial 1 of 3.

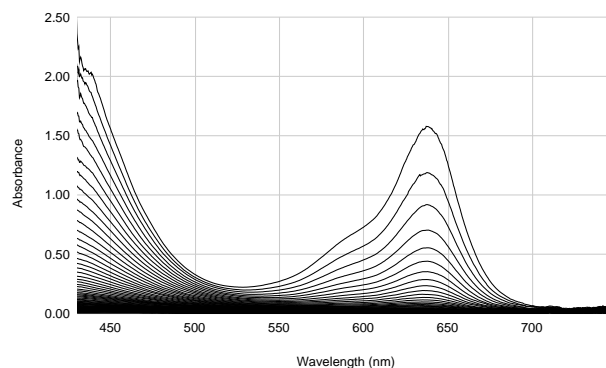

**Figure 11:** EAP absorbance spectrum of AB1. Conditions: BDD anode, graphite cathode, [AB1] = 100  $\mu$ M, [Na<sub>2</sub>S<sub>2</sub>O<sub>8</sub>] = 14 mM, stirring = 1000 rpm, current = 5 mA, overlay spectrum recorded every minute from 9 - 60 min. Trial 1 of 3.

### Plot of percent dye remaining vs time

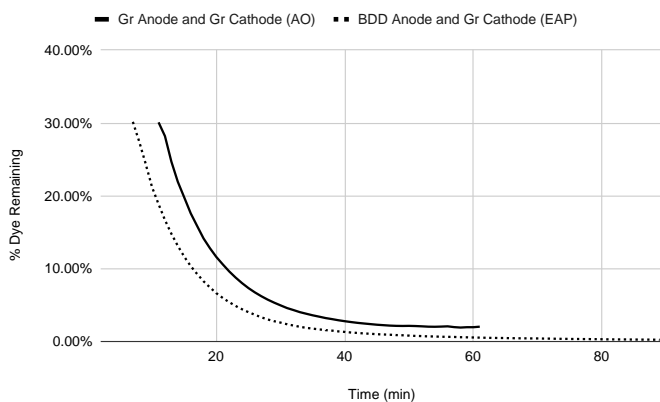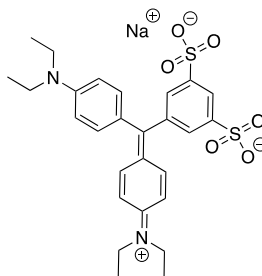

**Figure 12:** AO- and EAP-mediated decolorisation of AB1 as a function of time at a  $\lambda_{max}$  pH 0.62 = 436.82 nm,  $\lambda_{max}$  pH 7 = 638.04 nm.

## Basic Violet 3 (BV3)

### Absorbance spectra

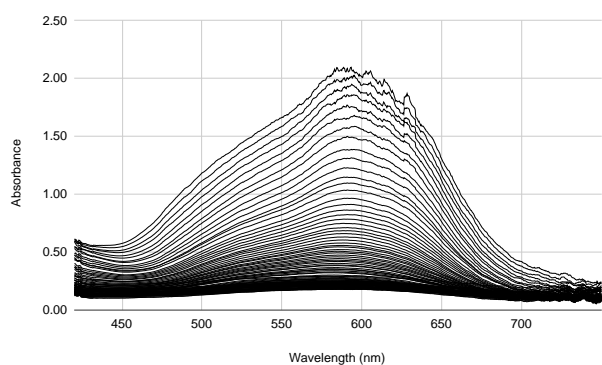

**Figure 13:** AO absorbance spectrum of BV3. Conditions: graphite anode, graphite cathode, [BV3] = 100  $\mu$ M, [Na<sub>2</sub>S<sub>2</sub>O<sub>8</sub>] = 14 mM, stirring = 1000 rpm, current = 5 mA, overlay spectrum recorded every minute from 19 - 120 min. Trial 1 of 3.

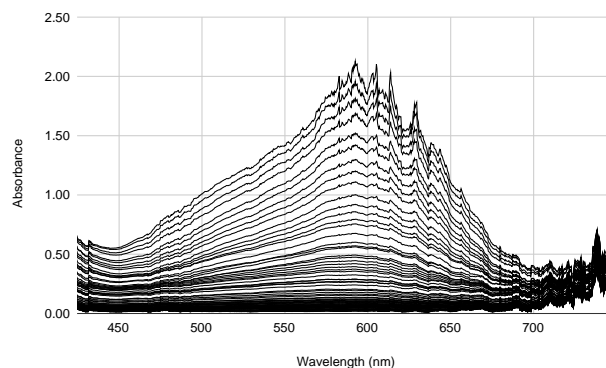

**Figure 14:** EAP absorbance spectrum of BV3. Conditions: BDD anode, graphite cathode, [BV3] = 100  $\mu$ M, [Na<sub>2</sub>S<sub>2</sub>O<sub>8</sub>] = 14 mM, stirring = 1000 rpm, current = 5 mA, overlay spectrum recorded every minute from 19 - 120 min. Trial 1 of 3.

### Plot of percent dye remaining vs time

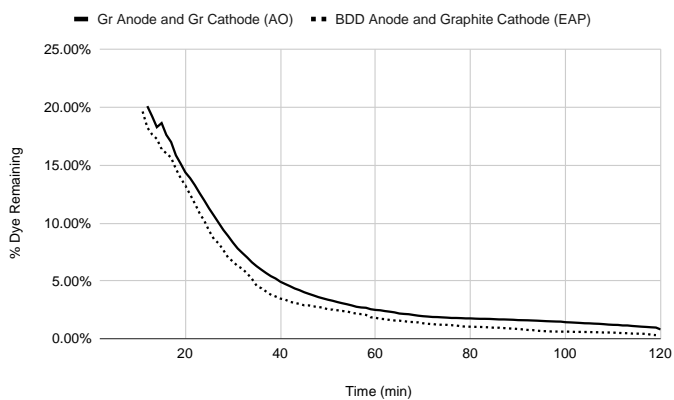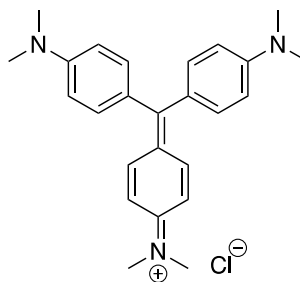

**Figure 15:** AO- and EAP-mediated decolorisation of BV3 as a function of time at a  $\lambda_{max}$  = 589.09 nm.



## Acid Violet 19 (AV19)

Absorbance spectra

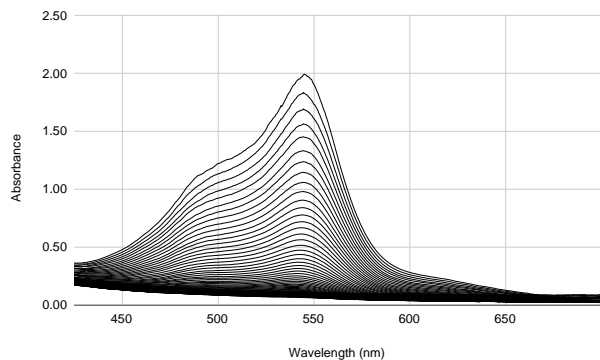

**Figure 16:** AO absorbance spectrum of AV19. Conditions: graphite anode, graphite cathode, [AV19] = 100  $\mu\text{M}$ , [Na<sub>2</sub>S<sub>2</sub>O<sub>8</sub>] = 14 mM, stirring = 1000 rpm, current = 5 mA, overlay spectrum recorded every minute from 25 - 105 min. Trial 1 of 3.

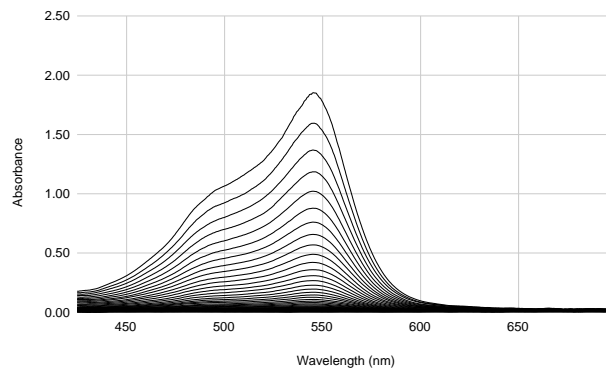

**Figure 17:** EAP absorbance spectrum of AR18. Conditions: BDD anode, graphite cathode, [AR18] = 100  $\mu\text{M}$ , [Na<sub>2</sub>S<sub>2</sub>O<sub>8</sub>] = 14 mM, stirring = 1000 rpm, current = 5 mA, overlay spectrum recorded every minute from 14 - 105 min. Trial 1 of 3.

Plot of percent dye remaining vs time

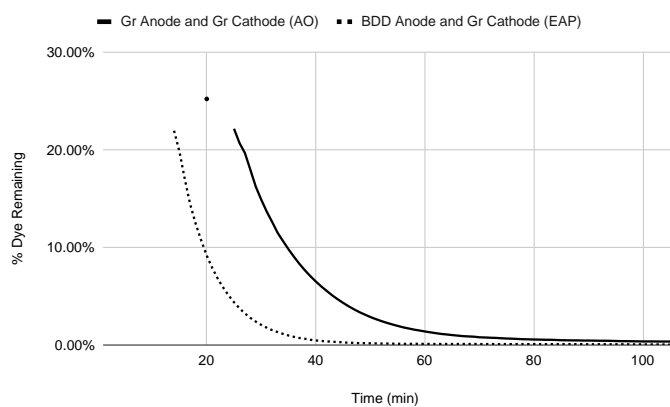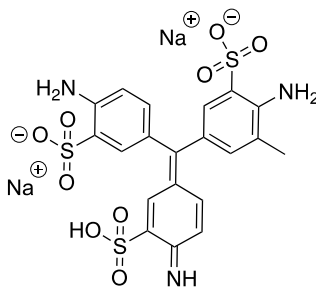

**Figure 18:** AO- and EAP-mediated decolorisation of AV19 as a function of time at a  $\lambda_{max}$  = 545.20 nm.

## Acid Red 51 (AR51)

### Absorbance spectra

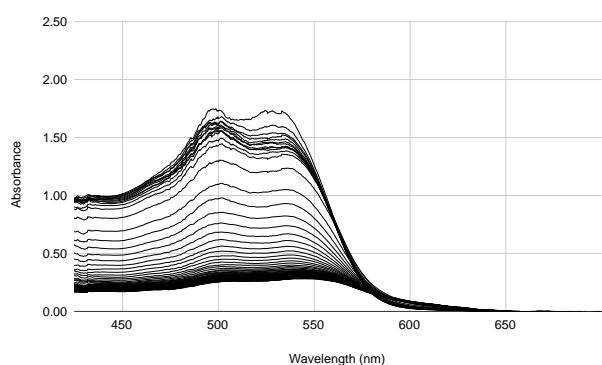

**Figure 19:** AO absorbance spectrum of AR51. Conditions: graphite anode, graphite cathode, [AR51] = 100  $\mu$ M, [Na<sub>2</sub>S<sub>2</sub>O<sub>8</sub>] = 14 mM, stirring = 1000 rpm, current = 5 mA, overlay spectrum recorded every minute from 3 - 90 min. Trial 1 of 3.

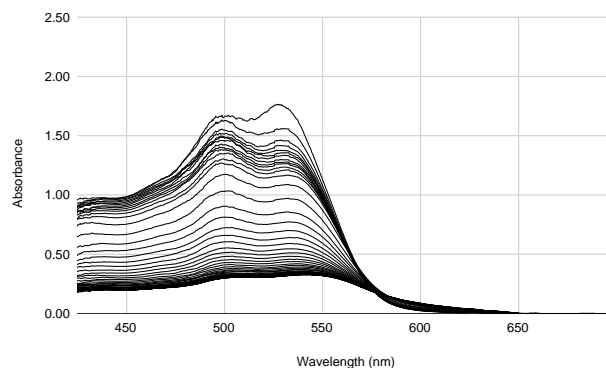

**Figure 20:** EAP absorbance spectrum of AR51. Conditions: BDD anode, graphite cathode, [AR51] = 100  $\mu$ M, [Na<sub>2</sub>S<sub>2</sub>O<sub>8</sub>] = 14 mM, stirring = 1000 rpm, current = 5 mA, overlay spectrum recorded every minute from 3 - 90 min. Trial 1 of 3.

### Plot of percent dye remaining vs time

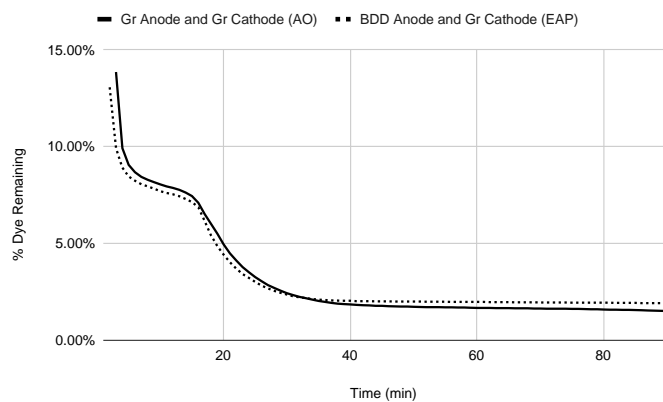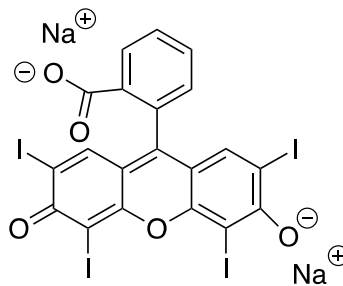

**Figure 21:** AO- and EAP-mediated decolorisation of AV19 as a function of time at a  $\lambda_{max}$  = 525.47 nm.

## Acid Red 87 (AR87)

Absorbance spectra

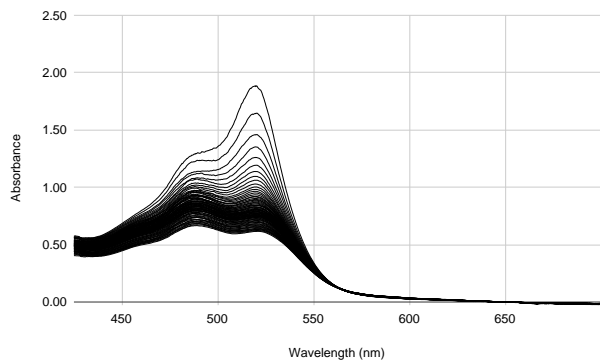

**Figure 22:** AO absorbance spectrum of AR87. Conditions: graphite anode, graphite cathode, [AR87] = 100  $\mu$ M, [Na<sub>2</sub>S<sub>2</sub>O<sub>8</sub>] = 14 mM, stirring = 1000 rpm, current = 5 mA, overlay spectrum recorded every minute from 6 - 59 min, then every other minute until 105 min. Trial 1 of 3.

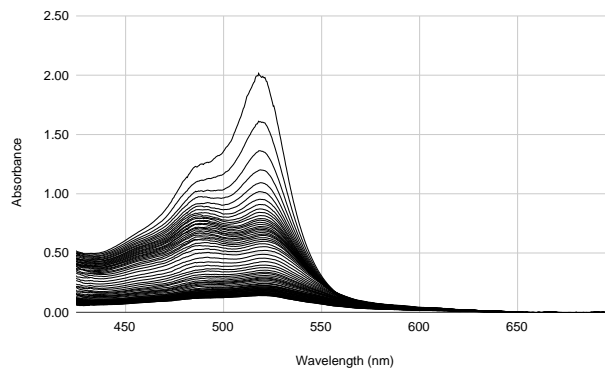

**Figure 23:** EAP absorbance spectrum of AR87. Conditions: BDD anode, graphite cathode, [AR87] = 100  $\mu$ M, [Na<sub>2</sub>S<sub>2</sub>O<sub>8</sub>] = 14 mM, stirring = 1000 rpm, current = 5 mA, overlay spectrum recorded every minute from 5 - 59 min, then every other minute until 105 min. Trial 1 of 3.

Plot of percent dye remaining vs time

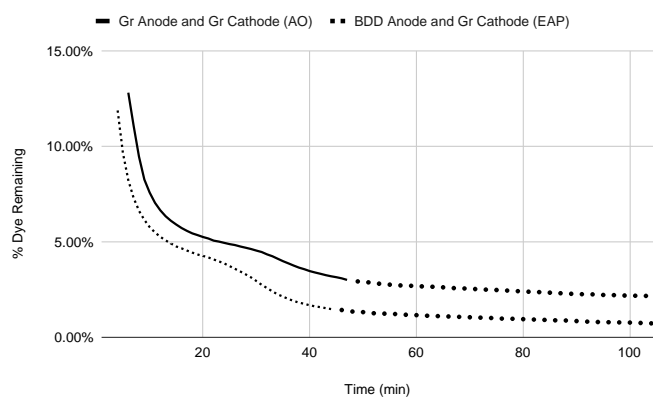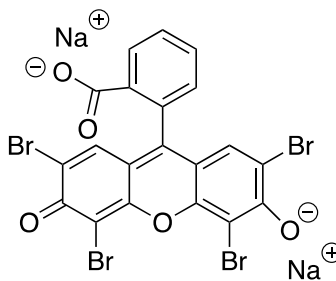

**Figure 24:** AO- and EAP-mediated decolorisation of AR87 as a function of time at a  $\lambda_{max}$  = 515.90 nm.

## Acid Red 91 (AR91)

### Absorbance spectra

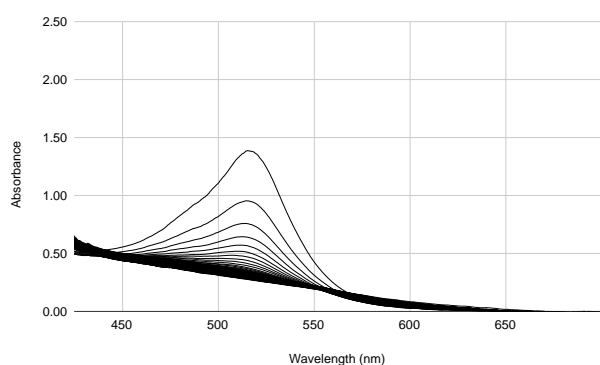

**Figure 25:** AO absorbance spectrum of AR91. Conditions: graphite anode, graphite cathode,  $[AR91] = 100\mu\text{M}$ ,  $[Na_2S_2O_8] = 14\text{ mM}$ , stirring = 1000 rpm, current = 5 mA, overlay spectrum recorded every minute from 2 - 45 min, then every other minute until 105 min. Trial 1 of 3.

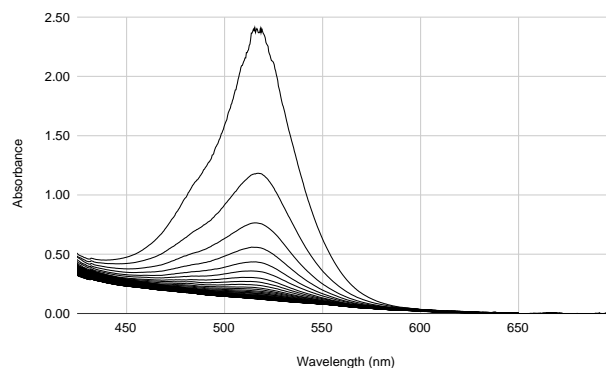

**Figure 26:** EAP absorbance spectrum of AR18. Conditions: BDD anode, graphite cathode,  $[AR18] = 100\mu\text{M}$ ,  $[Na_2S_2O_8] = 14\text{ mM}$ , stirring = 1000 rpm, current = 5 mA, overlay spectrum recorded every minute from 1 - 80 min. Trial 1 of 3.

### Plot of percent dye remaining vs time

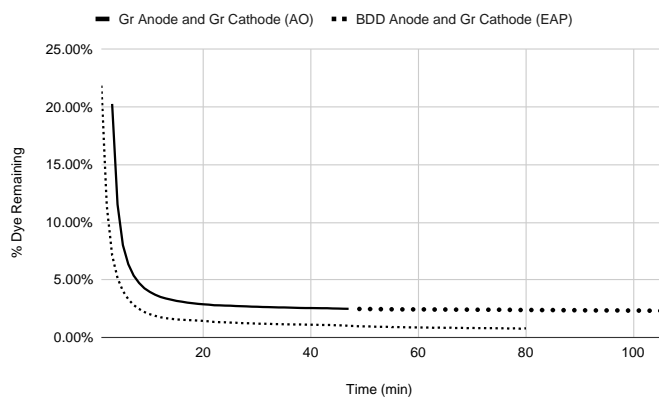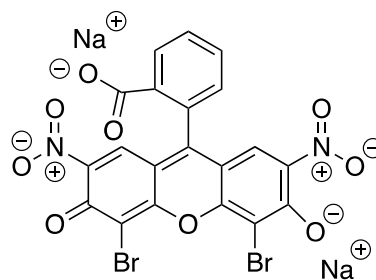

**Figure 27:** AO- and EAP-mediated decolorisation of AR91 as a function of time at a  $\lambda_{max} = 519.45\text{ nm}$ .

## First order rate constants

**Table 1:** First order rate constants at 20 min for nine dyes under two decolorisation protocols. AO conditions: Graphite anode and cathode, [Dye] = 100  $\mu\text{M}$ , [ $\text{Na}_2\text{S}_2\text{O}_8$ ] = 14 mM, stirring = 1000 rpm,  $I$  = 5 mA. EAP conditions: BDD anode, graphite cathode, [Dye] = 100  $\mu\text{M}$ , [ $\text{Na}_2\text{S}_2\text{O}_8$ ] = 14 mM, stirring = 1000 rpm,  $I$  = 5 mA.

|                              | Acid Orange<br>7      | Acid Orange<br>10     | Acid Red<br>18        | Acid Blue<br>1        | Basic<br>Violet 3     | Acid Violet<br>19     | Acid Red<br>51        | Acid Red<br>87        | Acid Red<br>91        |
|------------------------------|-----------------------|-----------------------|-----------------------|-----------------------|-----------------------|-----------------------|-----------------------|-----------------------|-----------------------|
| AO<br>( $\text{k s}^{-1}$ )  | $3.51 \times 10^{-3}$ | $2.42 \times 10^{-3}$ | $2.12 \times 10^{-3}$ | $1.87 \times 10^{-3}$ | $1.64 \times 10^{-3}$ | $1.15 \times 10^{-3}$ | $2.59 \times 10^{-3}$ | $2.47 \times 10^{-3}$ | $2.97 \times 10^{-3}$ |
| EAP<br>( $\text{k s}^{-1}$ ) | $3.71 \times 10^{-3}$ | $3.48 \times 10^{-3}$ | $3.17 \times 10^{-3}$ | $2.17 \times 10^{-3}$ | $1.64 \times 10^{-3}$ | $1.99 \times 10^{-3}$ | $2.60 \times 10^{-3}$ | $2.61 \times 10^{-3}$ | $3.54 \times 10^{-3}$ |
